# Supplementary material
Source: HighWire-hosted journal article supplement (https://www.cmajopen.ca/highwire/filestream/81023/field_highwire_adjunct_files/2/open-2016-0145-original-submission.pdf)
Supplement: open-2016-0145-original-submission.pdf [file open-2016-0145-original-submission.pdf]

# The effects of catastrophic drug plan deductibles on older women's use of cardiovascular medicines: a retrospective cohort study

Steven G. Morgan, PhD – Corresponding Author

School of Population and Public Health, Faculty of Medicine, University of British Columbia

2206 East Mall, Vancouver BC, Canada V6T 1Z3

Phone: 604-822-7012, Email: [steve.morgan@ubc.ca](mailto:steve.morgan@ubc.ca)

Emilie J. Gladstone, MPH

School of Population and Public Health, Faculty of Medicine, University of British Columbia

Deirdre Weymann, MA

Canadian Centre for Applied Research in Cancer Control

Nadia Khan, MSc, MD

Division of General Internal Medicine, Faculty of Medicine, University of British Columbia

**Article word count:** 3,240

**Running head:** Deductibles and women's use of prescription drugs

**Keywords:** pharmaceuticals, prescription drugs, access to medicines, deductibles, Canada

## Contributions

SM is responsible for study concept and design, interpretation of results, and drafting of the draft manuscript. EG and DW assisted with study design, analysis of data, interpretation of results, and revising the manuscript for important intellectual content. NK assisted with study design, interpretation of results, and revising the manuscript for important intellectual content.

## Funding

This work was supported in part by the Canadian Institutes of Health Research [CIHR DCO150GP]. The funding agency had no role in the study or decision to publish. All opinions and conclusions are those of the authors.

## Disclosure of Interests

The authors have no conflicts of interest to declare.

1  
2  
3 The effects of catastrophic drug plan deductibles on older women's use of  
4 cardiovascular medicines: a retrospective cohort study  
5  
6

7 **Background**  
8

9 We sought to examine the effects of income-based deductibles under British Columbia's Fair  
10 PharmaCare system on older patients' use of cardiovascular medicines in 2013, ten years after the policy  
11 change.  
12

13 **Methods**  
14

15 This is a retrospective analysis of linked administrative databases for the province of British Columbia,  
16 Canada. We study rates of cardiovascular medication used by two cohorts of older, married women who  
17 had different levels of public drug subsidy based solely on the age of their spouses. We compare 2013  
18 period prevalence and quantity of hypertension treatment and cholesterol treatment use with  
19 multivariable statistical models controlling for age, general health status, indicators of need for specific  
20 drug classes, ethnicity, and rural residence.  
21  
22

23 **Results**  
24

25 For women with incomes under \$50,000 (42% of our study population), having preferential public drug  
26 coverage by way of spousal age was associated with a 15% increase in the adjusted odds of filling one or  
27 more prescription for hypertension treatment (AOR = 1.15; 95% CI = [1.06, 1.24]) and a 13% increase in  
28 the adjusted odds of filling one or more prescription for cholesterol treatments (AOR = 1.13; 95% CI =  
29 [1.06, 1.21]). There were no statistically significant effects on the number of days of therapy purchased  
30 per user of these cardiovascular medicines.  
31  
32

33 **Interpretation**  
34

35 These results add to the body of evidence in support of the idea that public drug coverage design can  
36 effect access to necessary medications.  
37  
38  
39  
40  
41  
42  
43  
44  
45  
46  
47  
48  
49  
50  
51  
52  
53  
54  
55  
56  
57  
58  
59  
60

# The effects of catastrophic drug plan deductibles on older women's use of cardiovascular medicines: a retrospective cohort study

## Introduction

Public drug coverage in many Canadian provinces initially evolved as a form of targeted benefit for society's more vulnerable population sub-groups: e.g., the poor and the elderly.<sup>1</sup> In recent years, however, several provinces have implemented income-based catastrophic drug coverage in effort to provide at least some form of universal drug coverage while limiting government liability for escalating costs of medicines needed for an aging population.<sup>2</sup> The deductibles under these plans are set as a percentage of household income and range from 3% to 10% of median household incomes across provinces that offer such benefits.<sup>3</sup>

To date, the largest province to adopt a universal, income-based drug plan is British Columbia. It implemented its universal, income-based plan, called "Fair PharmaCare," in 2003.<sup>4</sup> Prior to this, the British Columbia "PharmaCare" program was an age-based public drug plan in the sense that, in addition to complete coverage of medicines for social assistance recipients of all ages, the public plan also covered virtually all drug costs, without deductibles, for people over age 65.<sup>5</sup>

To ease the transition from age-based to income-based drug coverage, the Fair PharmaCare program provided more comprehensive coverage for households with one or more family member born in 1939 or earlier – see Table 1. Policy-makers hoped the enhanced terms of coverage for older patients at the time of the policy change would prevent adverse drug utilization responses – and political pressures – stemming from the implementation of deductibles for older patients who were previously entitled to comprehensive public drug coverage.<sup>6</sup>

Despite efforts to mitigate the effects of the change in benefits, the implementation of Fair PharmaCare was shown to have reduced treatment adherence among older patients with respiratory disease, depression, and those who experienced myocardial infarction.<sup>7-10</sup> More recent research has also shown that British Columbians reported cost-related non-adherence to prescribed therapies more frequently than residents of other provinces.<sup>11,12</sup> It has been difficult to ascertain whether the more recent perceptions of barriers to accessing medications in British Columbia are the sustained effect of the move

1  
2  
3 to an income-based policy more than 10 years ago or the result of other influences on medication  
4 accessibility, such as relatively high housing costs.  
5  
6

7  
8 In this study, we examine the effects of the income-based deductibles under British Columbia's Fair  
9 PharmaCare system on older patients' use of cardiovascular medicines in 2013, ten years after the policy  
10 change. We use the household-level at which public drug coverage was offered to older British  
11 Columbians as a form of natural experiment. Specifically, we compare utilization of prescription drugs by  
12 two groups of married women born from 1940 to 1944: the first group comprised those who qualified  
13 for enhanced Fair PharmaCare coverage solely because their spouses were born in 1939 or earlier; the  
14 second group comprised married women of the same age who did not qualify for enhanced assistance  
15 because their spouses were born after 1939. The women with enhanced assistance by way of marriage  
16 faced lower deductibles and co-insurance levels than those who received standard assistance.  
17  
18  
19  
20  
21  
22

## 23 24 Methods

### 25 26 *Study design and setting*

27 This is a retrospective study of outpatient prescription drug dispensations to older British Columbians  
28 during 2013. All residents of British Columbia are covered under a universal, public health insurance  
29 program for medically necessary physicians' services and hospital care, including prescription drugs used  
30 in hospital, without direct cost to the patient. Residents are also eligible for pharmaceutical coverage  
31 under British Columbia's universal, income-based public drug benefit plan, Fair PharmaCare.  
32  
33  
34  
35  
36

### 37 38 *Data sources and cohort*

39 We obtained de-identified linked health datasets from Population Data BC with approval of relevant  
40 data stewards and the University of British Columbia's Behavioural Research Ethics Board.<sup>13-15</sup> The  
41 datasets included sociodemographic information and records of all prescription drug dispensations, fee-  
42 for-service physician visits, and hospitalizations for all study subjects during 2013. Our data on  
43 prescription drug purchases came from BC PharmaNet, which includes records of every prescription  
44 dispensed outside of acute care hospitals regardless of how the prescription was financed. These  
45 datasets excluded military veterans, registered First Nations, and inmates of federal penitentiaries (4%  
46 of the population, combined).  
47  
48  
49  
50  
51  
52

53  
54 Our study cohort included all women born from 1940 to 1944 who were alive and resided in British  
55 Columbia for at least 275 days in 2013 and whose spouses were alive at the beginning of 2013 (because  
56  
57  
58  
59  
60

1  
2  
3 benefits by way of spousal age only last one year following the death of that spouse). Among these  
4 women, those with spouses born in 1939 or earlier were eligible for enhanced Fair PharmaCare  
5 assistance, those with spouses born in 1940 or later were eligible for standard assistance. Too few men  
6 qualified for enhanced assistance by way of marriage to older spouses for us to conduct robust  
7 equivalent analyses for married men of the same generation.  
8  
9

10  
11  
12  
13 Datasets contained no information about whether women had private insurance for drug costs not paid  
14 for by the PharmaCare program. Those costs are simply identified as private expenditure on dispensed  
15 prescriptions, whether paid for out-of-pocket or through voluntary private insurance.  
16  
17

18  
19 Administrative datasets contain a primary diagnostic code (ICD-10) for every fee-for-service medical  
20 visit, and up to 25 diagnostic codes for each record of an acute care hospitalization (including day  
21 procedures). To ensure complete and comparable capture of available diagnostic information, we  
22 excluded subjects who lived in geographic areas that receive 25% or more of their medical care from  
23 non-fee-for-service providers (excluded regions accounted for less than 4% of the population). We also  
24 excluded residents of long-term care facilities and all recipients of social assistance because these  
25 individuals have unique health care needs and receive benefits under specific PharmaCare programs  
26 that do not involve deductibles. Finally, we excluded individuals who spent the more than half the year,  
27 183 days, in an acute care hospital (where drug costs are fully covered but not entered into available  
28 databases) because there would be incomplete prescription drug use data for such patients.  
29  
30  
31  
32  
33  
34  
35

### 36 37 *Variables*

38  
39 Using drug identification codes in the datasets, we identified all prescriptions for antihypertensives and  
40 cholesterol medications – details in Appendix A. We constructed two measures of the use of  
41 medications within each drug class. The first was a period prevalence measure of exposure: whether or  
42 not a study subject filled one or more prescription from the relevant drug class during 2013. The second  
43 was a measure of the quantity of relevant treatments used during the 2013 period: the number of days  
44 of therapy purchased over the course of the year among subjects that filled one or more prescription  
45 from the relevant drug class. Though this latter measure is similar to common adherence measures, it  
46 should be interpreted as adherence among prevalent users, not just new users, of the treatments.  
47  
48  
49  
50  
51  
52

53  
54 For each patient, we searched all medical and hospital records for 2013 to find diagnoses related to  
55 indicated uses for each drug class studied. For regression analyses, we grouped relevant diagnoses into  
56  
57  
58  
59  
60

1  
2  
3 Expanded Diagnostic Clusters of the John Hopkins ACG case-mix adjustment system (version 10.0) –  
4 details in Appendix B.  
5  
6

7  
8 Also using the diagnoses in all medical and hospital records for 2013, we gauged overall health status  
9 using counts of major Aggregated Diagnostic Groups of the John Hopkins ACG case-mix adjustment  
10 system. This approach to risk-adjustment for general health status has been validated for studying  
11 pharmaceutical use in British Columbia.<sup>16</sup>  
12  
13

14  
15  
16 Owing to high rates of participation in the income-based drug plan among older British Columbians, our  
17 datasets contained validated household-specific income information for 94% of our study population.<sup>17</sup>  
18 The remaining 6% of study subjects had not applied for coverage under the Fair PharmaCare program,  
19 perhaps because of lack of awareness or lack of need for the subsidy.<sup>18</sup> We assigned these individuals  
20 incomes based on the average taxable income per household in the neighbourhood in which they lived.  
21 We also assigned them to the level of Fair PharmaCare coverage they would have qualified for based on  
22 the age of their spouse (as these women's ages alone would qualify them all for standard assistance).  
23  
24  
25  
26  
27

28  
29 We assigned patients to ethnicity groups using a validated algorithm to identify surnames of the  
30 dominant ethnic minorities in British Columbia: Chinese (40% of minorities) and South Asians (26% of  
31 minorities).<sup>19,20</sup> Finally, we categorized neighbourhood urbanization based on the population density of  
32 the Local Health Area in which people lived.  
33  
34  
35

### 36 *Statistical analyses*

37  
38 We calculated population characteristics for the cohorts of women who qualified for either standard  
39 Fair PharmaCare or enhanced Fair PharmaCare assistance based on the age of their spouses. We  
40 estimated logistic regressions of our binary, period prevalence measures of drug utilization: use being  
41 defined as filling one or more relevant prescription in 2013. For the subset of users of each class of  
42 medicines, we estimated linear regressions of a continuous utilization measure: the number of days of  
43 therapy dispensed to patients over the year.  
44  
45  
46  
47  
48

49  
50 Our primary focus was the comparison of enhanced versus standard Fair PharmaCare assistance on  
51 utilization measures. Differences in enhanced versus standard PharmaCare assistance levels are greatest  
52 at income levels below \$50,000. Therefore, we tested for the effect of enhanced assistance below and  
53 equal or above \$50,000 using separate dummy variables for each of these ranges of income.  
54  
55  
56  
57  
58  
59  
60

1  
2  
3 After testing for collinearity between explanatory variables and comparing goodness of fit across  
4 models, our final models controlled for age, general health status, indicators of need for specific drug  
5 classes, ethnicity, level of neighbourhood urbanization, and enhanced assistance for pharmacare. We  
6 ran sensitivity analyses on samples stratified by income levels (above and below \$50,000) and on  
7 different specifications of income levels and enhanced assistance. For all analyses, a value of  $p < 0.05$   
8 was considered statistically significant. All analyses were performed using Stata version 13.1 (College  
9 Station, TX) and SAS version 9.3 (SAS Institute, Cary, NC).  
10  
11  
12  
13  
14  
15

## 16 Findings

17  
18 A total of 53,285 women met our study inclusion criteria, 53% of whom qualified for enhanced  
19 assistance under the Fair PharmaCare program by way of their spouse's age. Table 2 lists the  
20 characteristics of the study cohort, stratified by assistance level. Women who qualified for enhanced  
21 assistance under the Fair PharmaCare program were older than women receiving standard assistance,  
22 which was expected given they had to be married to older spouses. They were also more likely to have a  
23 greater number of comorbid conditions, have lower family income, and were more likely to have  
24 registered for the public drug plan. Women who qualified for enhanced assistance were also more likely  
25 to have a Chinese surname, which reflects greater average differences in spouses' age among Asian  
26 couples.<sup>21</sup> There were no significant differences between beneficiary groups in terms of overall use of  
27 medical or hospital care.  
28  
29  
30  
31  
32  
33  
34  
35  
36

37 Table 3 lists detailed results from regression analyses for the drug classes of interest: antihypertensive  
38 drugs and cholesterol drugs. There was an age gradient in the period prevalence of exposure to  
39 antihypertensives and cholesterol drugs in our study cohort, as expected, with older subjects being  
40 more likely to fill prescriptions for these medications than younger subjects. Patients with worse overall  
41 health status, as measured by higher counts of major ADGs, were also more likely to fill antihypertensive  
42 and cholesterol prescriptions. When compared to exposure to therapy, age and general health status  
43 had fewer statistically significant effects on the average duration of therapy used per patient filling one  
44 or more prescription for antihypertensives or cholesterol drugs.  
45  
46  
47  
48  
49  
50  
51

52 Patient ethnicity had some statistically significant effects on the use of the cardiovascular medicines  
53 studied. After controlling for other factors, the model found women of Chinese ethnicity to be less likely  
54 to fill one or more prescription for antihypertensives (AOR = 0.63, 95% CI = [0.57, 0.69]), but more likely  
55 to fill one or more prescription for cholesterol drugs (AOR = 1.24, 95% CI = [1.14, 1.34]). Chinese women  
56  
57  
58  
59  
60

1  
2  
3 who filled one or more prescriptions for hypertension purchased fewer overall days of antihypertensives  
4 than other women (Beta = -49.5, 95% CI = [-64, -35]). South Asian women were also less likely to fill one  
5 or more prescription for antihypertensives (AOR = 0.83, 95% CI = [0.73, 0.94]) and more likely to fill one  
6 or more prescription for cholesterol drugs (AOR = 1.44, 95% CI = [1.30, 1.60]). South Asian women who  
7 filled one or more cholesterol prescription purchased fewer days of those treatments than other women  
8 (Beta = -17.4, 95% CI = [-27.4, -7.3]).  
9

10  
11  
12 After controlling for other factors in the model, we found income had no statistically significant effects  
13 on the likelihood that women in our study filled one or more prescription for hypertension treatments.  
14 Income also had limited statistically significant effects on the likelihood of filling one or more  
15 prescriptions for cholesterol drugs. Higher incomes were associated with purchasing more days of  
16 antihypertensive and cholesterol therapy among those using these therapies.  
17  
18

19  
20  
21 Enhanced assistance under the Fair PharmaCare program had statistically significant effects on the  
22 likelihood of filling one or more prescription for antihypertensives and cholesterol drugs. After  
23 controlling for other health and socioeconomic factors, the model found women with incomes below  
24 \$50,000 who qualified for enhanced assistance by way of the age of their spouses to have 15% higher  
25 adjusted odds of filling one or more prescription for antihypertensives than women who did not qualify  
26 for enhanced assistance (AOR = 1.15, 95% CI = [1.06, 1.24]). Women with incomes below \$50,000 who  
27 qualified for enhanced assistance had 13% higher adjusted odds of filling one or more prescription for  
28 cholesterol drugs than women who did not qualify for enhanced assistance (AOR = 1.13, 95% CI = [1.06,  
29 1.21]).  
30  
31

32  
33  
34 Among women with incomes above \$50,000, enhanced Fair PharmaCare assistance did not have a  
35 statistically significant effect on the odds of filling one or more prescription for antihypertensives.  
36 Women with incomes above \$50,000 who qualified for enhanced assistance by way of the age of their  
37 spouses had 8% higher adjusted odds of filling one or more prescription for cholesterol drugs than  
38 women who did not qualify for enhanced assistance (AOR = 1.08, 95% CI = [1.01, 1.15]).  
39  
40

41  
42  
43 Enhanced assistance under the Fair PharmaCare program had no statistically significant effects on the  
44 average duration of treatment purchased by study subjects who filled one or more prescription for  
45 antihypertensives or cholesterol drugs.  
46  
47  
48  
49  
50  
51  
52  
53  
54  
55  
56  
57  
58  
59  
60



## Discussion

Using a natural experiment by way of public drug plan design in British Columbia, we found lower deductibles under an income-based drug benefit program to be associated with increased access to cardiovascular medications. For women with incomes under \$50,000 (42% of our study population), having lower deductibles under the Fair PharmaCare program in British Columbia was associated with a 15% increase in the odds of filling one or more prescription for hypertension treatment in 2013 (AOR = 1.15; 95% CI = [1.06, 1.24]) and a 13% increase in the odds of filling one or more prescription for cholesterol treatments (AOR = 1.13; 95% CI = [1.06, 1.21]) after controlling for other factors associated with medication use, including income.

Our findings concerning the effects of health status, age, and ethnicity were consistent with prior research on medication use among the more general population in British Columbia.<sup>22-24</sup> Our findings concerning the effects of Fair PharmaCare deductibles on access to cardiovascular treatments are also consistent with earlier studies of the drug plan in British Columbia. Those studies found that the implementation of income-based deductibles for older residents' drug coverage reduced the use of statins and beta blockers (a hypertension drug class).<sup>8,9</sup>

We found that lower deductibles by way of enhanced assistance under the Fair PharmaCare program had little effect on the quantity of treatments purchased among patients filling one or more prescription for the cardiovascular drug classes studied. This finding appears to be inconsistent with studies showing that comprehensive drug coverage improves persistence with prescribed therapies following index prescriptions.<sup>25</sup> We note, however, that the effect of cost-related non-adherence is likely to appear in our exposure statistics rather than quantity measures. This is because only a fraction of the patients in our period prevalence exposure measures (i.e., those filling one or more prescription for medications in 2013) would have been truly incident users in that year. Most patients identified as users of medicines in our study would have initiated therapy years prior to 2013, potentially many years prior. Those who initiated treatment in prior years and then stopped treatment quickly because of cost don't show up in our data as "low-quantity users," they show up in our data as "non-users."

## Study limitations

The natural experiment used in this study has advantages insofar as the means of qualifying for enhanced coverage in British Columbia – spousal age – was independent of health needs or other

1  
2  
3 factors related to medication accessibility. This study is not without drawbacks, however. First,  
4 developing comparable cohorts of enhanced versus standard benefits recipients required that we focus  
5 on a narrow age-range of a specific demographic. Our findings for the older married women in this study  
6 may not generalize to men, unmarried women, or younger populations. Furthermore, the limited  
7 sample sizes resulting from our study design made it infeasible to use index events (such as heart attack)  
8 to measure differences in treatment initiation and subsequent persistence. Limitations of sample size  
9 also resulted in relatively wide confidence intervals.

10  
11  
12 While the administrative data used in this study do not contain details, such as disease severity, that are  
13 important determinants of prescription decision-making, our natural experiment involved a mechanism  
14 of assigning subjects to enhanced versus standard coverage for medications based on a personal  
15 characteristic that is unlikely to be correlated with unobserved confounding. There were income and  
16 health status differences in our study cohorts; yet, those differences likely stemmed from the fact that  
17 enhanced assistance beneficiaries were closer in age to the upper limit of 73 years (because their  
18 husbands were all 74 years of age or older). There were also ethnic differences in our cohorts, which  
19 may have arisen from cultural norms concerning the average age difference between spouses for the  
20 generation of persons in our study sample. Once age, income, and ethnicity were controlled for, it is  
21 unlikely that differences in likelihood of treatment exposure found in our study resulted from  
22 unobserved confounding.

23  
24  
25 Finally, the government of British Columbia does not collect data on whether or not citizens have private  
26 insurance for drug costs below the deductibles under the public drug plan and our study assessed  
27 utilization patterns as a function of benefit levels 10 years after the initial implementation of income-  
28 based deductibles for public coverage of medicines used by older British Columbians. By that time, many  
29 individuals who could access private drug coverage through their employment may have done so. The  
30 unmeasured existence of voluntary private insurance is an unobserved confounding factor that may bias  
31 our results toward the null hypothesis of no difference in drug utilization between groups. This is  
32 because the control group of women in our study – those with standard assistance under the Fair  
33 PharmaCare system – were more likely to have private insurance because they were married to younger  
34 men. This is because it is more likely that younger (virtually always male) spouses were more likely to be  
35 working at the time of our analysis than older spouses, and they were therefore more likely to have  
36 employer-provided private insurance.<sup>3</sup>

## Conclusion

We have found that the level of income-based deductibles under catastrophic drug benefit plans can affect the use of cardiovascular drug treatments, even long after deductibles are put in place. The results of this study therefore add to the body of evidence in support of the idea that public drug coverage designs should limit the costs to patients for treatments that are essential to the maintenance of good health.<sup>25,26</sup>

Confidential

## References

1. Morgan S, Barer M, Agnew J. Whither seniors' pharmacare: Lessons from (and for) Canada. *Health Affairs*. 2003;22:49-59.
2. Morgan SG, Daw JR, Law M. *Are Income-Based Public Drug Benefit Programs Fit for an Aging Population?* Montreal: The Institute for Research in Public Policy;2014.
3. Barnes S, Anderson L. *Low Earnings, Unfilled Prescriptions: Employer-Provided Health Benefit Coverage in Canada*. Toronto: Wellesley Institute; July 2015.
4. British Columbia. Fair PharmaCare Starts May 1, 2003. 2003; <https://archive.news.gov.bc.ca/releases/archive/2001-2005/2003HSER0013-000192-Attachment1.htm>. Accessed March 10, 2016.
5. Daw JR, Morgan SG. Stitching the gaps in the Canadian public drug coverage patchwork? A review of provincial pharmacare policy changes from 2000 to 2010. *Health Policy*. 2012;104:19-26.
6. Morgan S, Coombes M. Income-based drug coverage in British Columbia: toward an understanding of the policy. *Healthcare Policy* 2006;2 92-108.
7. Dormuth CR, Glynn RJ, Neumann P, Maclure M, Brookhart AM, Schneeweiss S. Impact of two sequential drug cost-sharing policies on the use of inhaled medications in older patients with chronic obstructive pulmonary disease or asthma. *Clinical Therapeutics*. 2006;28:964-78.
8. Schneeweiss S, Patrick AR, Maclure M, Dormuth CR, Glynn RJ. Adherence to statin therapy under drug cost sharing in patients with and without acute myocardial infarction: a population-based natural experiment. *Circulation*. 2007;115:2128-35.
9. Schneeweiss S, Patrick AR, Maclure M, Dormuth CR, Glynn RJ. Adherence to beta-blocker therapy under drug cost-sharing in patients with and without acute myocardial infarction. *The American Journal of Managed Care*. 2007;13:445-52.
10. Wang PS, Patrick AR, Dormuth CR, et al. The impact of cost sharing on antidepressant use among older adults in British Columbia. *Psychiatric Services*. 2008;59:377-83.
11. Law MR, Cheng L, Dhalla IA, Heard D, Morgan SG. The effect of cost on adherence to prescription medications in Canada. *CMAJ*. 2012;184:297-302.
12. Angus Reid Institute. *Prescription drug access and affordability an issue for nearly a quarter of all Canadian households*. Vancouver: Angus Reid Institute;2015.
13. Canadian Institute for Health Information [creator]. *Discharge Abstract Database (Hospital Separations): Population Data BC [publisher] Data Extract*. MOH (2014). <http://www.popdata.bc.ca/data.;2015>.
14. BC Ministry of Health [creator]. *Medical Services Plan (MSP) Payment Information File*. Population Data BC [publisher]. : Population Data BC [publisher] Data Extract. MOH (2014). <http://www.popdata.bc.ca/data.;2015>.
15. BC Ministry of Health [creator]. *PharmaNet*. : BC Ministry of Health [publisher]. Data Extract. Data Stewardship Committee (2014). <http://www.popdata.bc.ca/data.;2015>.
16. Hanley GE, Morgan S, Reid RJ. Explaining Prescription Drug Use and Expenditures Using the Adjusted Clinical Groups Case-Mix System in the Population of British Columbia, Canada. *Medical Care*. 2010;48:402-8 10.1097/MLR.0b013e3181ca3d5d.
17. Hanley G, Morgan S. On the validity of area-based income measures to proxy household income. *BMC Health Services Research*. 2008;8:79.
18. Leong V, Morgan S, Wong S, Hanley G, Black C. Registration for public drug benefits across areas of differing ethnic composition in British Columbia, Canada. *BMC Health Services Research*. 2010;10:171.

19. Shah BR, Chiu M, Amin S, Ramani M, Sadry S, Tu JV. Surname lists to identify South Asian and Chinese ethnicity from secondary data in Ontario, Canada: a validation study. *BMC medical research methodology*. 2010;10:42-.
20. British Columbia. *The Diversity of Visible Minorities and Ethnic Origins in BC*. Victoria: Ministry of Attorney General and Minister Responsible for Multiculturalism;2008.
21. Boyd M, Li A. May-December: Canadians in age-discrepant relationships. *Canadian Social Trends*. 2003:29-33.
22. Smolina K, Ball L, Humphries KH, Khan N, Morgan SG. Sex Disparities in Post-Acute Myocardial Infarction Pharmacologic Treatment Initiation and Adherence: Problem for Young Women. *Circulation: Cardiovascular Quality and Outcomes*. 2015.
23. Morgan SG, Hanley G, Cunningham C, Quan H. Ethnic differences in the use of prescription drugs: a cross-sectional analysis of linked survey and administrative data. *Open Medicine*. 2011;5.
24. Morgan SG, Weymann D, Pratt B, et al. Sex differences in the risk of receiving potentially inappropriate prescriptions among older adults. *Age and Ageing*. 2016.
25. Adams AS, Soumerai SB, Ross-Degnan D. The case for a medicare drug coverage benefit: a critical review of the empirical evidence. *Annual Review of Public Health*. 2001;22:49-61.
26. Kesselheim AS, Huybrechts KF, Choudhry NK, et al. Prescription drug insurance coverage and patient health outcomes: a systematic review. *Am J Public Health*. 2015;105:e17-30.

1  
2  
3  
4  
5  
6  
7  
8  
9  
10  
11  
12  
13  
14  
15  
16  
17  
18  
19  
20  
21  
22  
23  
24  
25  
26  
27  
28  
29  
30  
31  
32  
33  
34  
35  
36  
37  
38  
39  
40  
41  
42  
43  
44  
45  
46  
47  
48  
49  
50  
51  
52  
53  
54  
55  
56  
57  
58  
59  
60

Table 1 – Terms of Enhanced and Standard Fair PharmaCare Assistance

| <b>Enhanced assistance for households with one or more member born in 1939 or earlier</b> |                                                      |                                                                   |                                                                                                |
|-------------------------------------------------------------------------------------------|------------------------------------------------------|-------------------------------------------------------------------|------------------------------------------------------------------------------------------------|
| <b>Household income</b>                                                                   | <b>Deductible, as percentage of household income</b> | <b>Co-insurance paid by household after deductible is reached</b> | <b>Threshold beyond which government pays all drug costs as percentage of household income</b> |
| Less than \$33,000                                                                        | 0%                                                   | 25%                                                               | 1.25%                                                                                          |
| \$33,000 to \$50,000                                                                      | 1%                                                   | 25%                                                               | 2%                                                                                             |
| Over \$50,000                                                                             | 2%                                                   | 25%                                                               | 3%                                                                                             |
| <b>Standard assistance for all other households</b>                                       |                                                      |                                                                   |                                                                                                |
| <b>Household income</b>                                                                   | <b>Deductible, as percentage of household income</b> | <b>Co-insurance paid by household after deductible is reached</b> | <b>Threshold beyond which government pays all drug costs as percentage of household income</b> |
| Less than \$15,000                                                                        | 0%                                                   | 30%                                                               | 2%                                                                                             |
| \$15,000 to \$30,000                                                                      | 2%                                                   | 30%                                                               | 3%                                                                                             |
| Over \$30,000                                                                             | 3%                                                   | 30%                                                               | 4%                                                                                             |

Confidential

Table 2 – Characteristics of study population, stratified by eligibility for enhanced Fair PharmaCare

|                                             | Standard Assistance | Enhanced Assistance |
|---------------------------------------------|---------------------|---------------------|
| <b>Number of subjects</b>                   | 28,359              | 24,926              |
| <b>Age*</b>                                 |                     |                     |
| 69                                          | 31.6%               | 13.3%               |
| 70                                          | 26.3%               | 16.9%               |
| 71                                          | 19.8%               | 20.4%               |
| 72                                          | 13.5%               | 22.9%               |
| 73                                          | 8.8%                | 26.5%               |
| <b>Health Status *</b>                      |                     |                     |
| 1-2 Major ADGs                              | 43.8%               | 44.8%               |
| 3+ Major ADGs                               | 6.9%                | 7.7%                |
| <b>1+ diagnoses of primary indications*</b> |                     |                     |
| Antihypertensives                           | 58.6%               | 62.3%               |
| Cholesterol drugs                           | 19.8%               | 21.2%               |
| <b>Income*</b>                              |                     |                     |
| \$0-\$14,999                                | 2.5%                | 2.8%                |
| \$15,000-\$29,999                           | 11.1%               | 15.9%               |
| \$30,000-\$32,999                           | 2.0%                | 5.5%                |
| \$33,000-\$42,999                           | 11.6%               | 14.5%               |
| \$43,000-\$49,999                           | 8.6%                | 10.6%               |
| \$50,000-\$56,999                           | 12.1%               | 9.7%                |
| \$57,000-\$69,999                           | 14.8%               | 11.1%               |
| \$70,000+                                   | 37.2%               | 30.0%               |
| <b>Fair PharmaCare*</b>                     |                     |                     |
| Registered for plan                         | 91.1%               | 96.0%               |
| <b>Ethnicity*</b>                           |                     |                     |
| Chinese                                     | 6.1%                | 11.3%               |
| South Asian                                 | 4.1%                | 4.0%                |
| <b>Rural dwelling</b>                       |                     |                     |
| Rural                                       | 8.1%                | 8.2%                |
| <b>Overall health care use</b>              |                     |                     |
| Average total cost of medical care          | \$1,112             | \$1,167             |
| Average number of medical care visits       | 16.8                | 17.7                |
| Average total cost of hospital care         | \$1,067             | \$1,112             |
| Share with 1 or more hospitalization        | 22.1%               | 22.3%               |

\* Difference significant at p = 0.05

Table 3 – Regression results: adjusted odds ratios for the likelihood of filling at least one prescription, and adjusted difference in days of therapy per person filling at least one prescription, antihypertensives and cholesterol treatments

|                                                | Exposure to treatment    |                          | Duration of treatment    |                            |
|------------------------------------------------|--------------------------|--------------------------|--------------------------|----------------------------|
|                                                | Antihypertensives        | Cholesterol treatments   | Antihypertensives        | Cholesterol treatments     |
|                                                | AOR [95% CI]             | AOR [95% CI]             | BETA [95% CI]            | BETA [95% CI]              |
| <b>Age (69 = ref.)</b>                         |                          |                          |                          |                            |
| 70                                             | 1.01 [0.94, 1.08]        | <b>1.10 [1.03, 1.17]</b> | 2.1 [-9.1, 13.3]         | -0.7 [-7.7, 6.2]           |
| 71                                             | <b>1.15 [1.07, 1.24]</b> | <b>1.10 [1.03, 1.18]</b> | 9.1 [-2.2, 20.5]         | -3.5 [-10.5, 3.6]          |
| 72                                             | <b>1.14 [1.06, 1.24]</b> | <b>1.14 [1.06, 1.22]</b> | <b>17.6 [5.9, 29.4]</b>  | <b>-2.1 [-9.4, 5.2]</b>    |
| 73                                             | <b>1.19 [1.10, 1.29]</b> | <b>1.19 [1.11, 1.28]</b> | <b>14.5 [2.5, 26.5]</b>  | <b>-2.1 [-9.5, 5.3]</b>    |
| <b>Health: # of Major ADGs (0 = ref.)</b>      |                          |                          |                          |                            |
| 1 to 2                                         | <b>1.30 [1.23, 1.37]</b> | <b>1.26 [1.20, 1.32]</b> | <b>14.7 [6.5, 22.8]</b>  | 4.7 [-0.5, 9.8]            |
| 3+                                             | <b>1.34 [1.21, 1.49]</b> | <b>1.39 [1.28, 1.52]</b> | -1.4 [-15.2, 12.5]       | <b>-5.6 [-14, 2.7]</b>     |
| <b>Ethnicity (White/other = ref.)</b>          |                          |                          |                          |                            |
| Chinese                                        | <b>0.63 [0.57, 0.69]</b> | <b>1.24 [1.14, 1.34]</b> | <b>-49.5 [-64, -35]</b>  | -3.2 [-11.4, 5]            |
| South Asian                                    | <b>0.83 [0.73, 0.94]</b> | <b>1.44 [1.30, 1.60]</b> | -10.9 [-28.6, 6.8]       | <b>-17.4 [-27.4, -7.3]</b> |
| <b>Setting (Urban/suburban = ref.)</b>         |                          |                          |                          |                            |
| Rural setting                                  | <b>1.10 [1.01, 1.21]</b> | 0.94 [0.86, 1.02]        | 6.6 [-6.6, 19.7]         | -0.4 [-8.9, 8.2]           |
| <b>Income (Under \$15,000 = ref.)</b>          |                          |                          |                          |                            |
| \$15,000-\$29,999                              | 1.01 [0.86, 1.20]        | <b>1.19 [1.03, 1.37]</b> | <b>34.4 [10.6, 58.2]</b> | 5.6 [-8.7, 19.9]           |
| \$30,000-\$32,999                              | 0.89 [0.73, 1.09]        | 1.15 [0.97, 1.37]        | <b>47.5 [18.5, 76.4]</b> | -0.4 [-17.8, 17]           |
| \$33,000-\$42,999                              | 0.99 [0.83, 1.17]        | 1.12 [0.97, 1.30]        | <b>52.6 [28.0, 77.1]</b> | 11.7 [-3.0, 26.5]          |
| \$43,000-\$49,999                              | 0.96 [0.81, 1.15]        | 1.05 [0.90, 1.23]        | <b>46.6 [21.2, 72.0]</b> | 12.5 [-2.8, 27.8]          |
| \$50,000-\$56,999                              | 1.00 [0.83, 1.19]        | 1.11 [0.95, 1.30]        | <b>44.8 [18.8, 70.8]</b> | <b>17.6 [2.0, 33.3]</b>    |
| \$57,000-\$69,999                              | 1.02 [0.86, 1.22]        | 0.96 [0.82, 1.13]        | <b>40.6 [14.8, 66.4]</b> | <b>19.3 [3.7, 34.9]</b>    |
| \$70,000+                                      | 0.93 [0.78, 1.10]        | 0.89 [0.77, 1.03]        | <b>35.5 [10.9, 60.1]</b> | <b>23.6 [8.8, 38.4]</b>    |
| <b>PharmaCare assistance (Standard = ref.)</b> |                          |                          |                          |                            |
| Enhanced under \$50,000                        | <b>1.15 [1.06, 1.24]</b> | <b>1.13 [1.06, 1.21]</b> | 7.5 [-3.6, 18.7]         | 6.1 [-0.7, 12.8]           |
| Enhanced over \$50,000                         | 0.98 [0.91, 1.04]        | <b>1.08 [1.01, 1.15]</b> | 4.1 [-6.2, 14.5]         | -0.3 [-6.7, 6.2]           |

Note: all models also adjusted for category-specific indications for use that are listed in Appendix B. Bolded estimates are statistically significant ( $p < 0.05$ ).
